# Supplementary material for: Gaze behavior and decision-making among handball referees: exploring gender and expertise differences
Source: PeerJ. 2025 May 14;13:e19401. doi: 10.7717/peerj.19401 (PMC12085115; doi:10.7717/peerj.19401)
Supplement: Supplemental Information 1 [file peerj-13-19401-s001.xlsx]

## Sheet: Arkusz1
NUMBER	SEX	AGE	Competition level	Experience	Video 1 (Play On)	V1 Fixation Count	V1 Average fixation duration	V1 Saccades count	V1 Average saccades duration	Video 2 (7M)	V2 Fixation Count	V2 Average fixation duration	V2 Saccades count	V2 Average saccades duration	Video 3 (Ofensive Foul)	V3 Fixation Count	V3 Average fixation duration	V3 Saccades count	V3 Average saccades duration	Video 4 (9M)	V4 Fixation Count	V4 Average fixation duration	V4 Saccades count	V4 Average saccades duration	Video 5 (Punishment)	V5 Fixation Count	V5 Average fixation duration	V5 Saccades count	V5 Average saccades duration	Video 6 (Play On)	V6 Fixation Count	V6 Average fixation duration	V6 Saccades count	V6 Average saccades duration	Video 7 (Ofensive Foul)	V7 Fixation Count	V7 Average fixation duration	V7 Saccades count	V7 Average saccades duration	Video 8 (Play On)	V8 Fixation Count	V8 Average fixation duration	V8 Saccades count	V8 Average saccades duration	Video 9 (9M)	V9 Fixation Count	V9 Average fixation duration	V9 Saccades count	V9 Average saccades duration
1	0	36	2	13	1	19	208.38	38	28.74	2	13	311.2	23	35.17	3	17	229.58	28	31.88	4	20	178.99	37	39.78	5	26	128.21	61	30.16	6	19	205.8	41	41.35	7	14	214.41	40	17.4	8	22	150.87	52	30.81	9	20	199.07	34	31.63
2	1	23	1	5	1	21	208.86	37	20.91	2	21	180.5	37	20.04	3	25	115.38	71	21.6	4	24	205.13	29	17.38	5	26	164.65	45	21.82	6	20	188.15	61	18.46	7	21	179.64	49	17.27	8	23	190.93	36	20.24	9	28	133.64	53	20.8
3	1	33	2	12	1	21	208.26	34	23.9	2	28	141.68	39	20.9	3	27	139.96	51	16.69	4	21	175	49	26.95	5	20	204.5	45	28.97	6	17	270.09	39	18.22	7	16	269.09	33	20.36	8	27	161.46	44	16.95	9	17	217.23	41	28.18
4	1	25	0	6	1	18	261.11	25	26.56	2	23	156.87	44	20.59	3	23	182.61	36	20.17	4	24	197.58	36	15.83	5	19	212.16	49	26.06	6	20	214.62	43	24.28	7	20	231.59	27	25.33	8	28	152.89	42	21.24	9	21	188.4	42	24.33
5	1	22	1	7	1	11	384.77	18	58.72	2	11	373.12	20	38.62	3	14	301.81	21	30.38	4	16	302.47	19	37.97	5	18	254.22	29	34.53	6	19	250.39	28	35.16	7	20	223.57	32	26.56	8	23	195.6	30	32.48	9	17	248.82	26	40.02
6	1	38	2	12	1	18	238.59	31	25.6	2	21	173.7	39	22.01	3	26	117.57	59	22.86	4	22	187.75	45	17.94	5	62	137.4	116	29.47	6	29	144.58	54	20.12	7	27	159.17	43	19.27	8	27	153.2	40	24.35	9	24	181.91	36	19.15
7	1	25	2	9	1	21	193.24	46	17.65	2	18	214.18	36	19.94	3	22	198.55	34	16.29	4	24	195.3	34	19.09	5	25	175.44	48	20.54	6	145	170.65	323	37.32	7	21	184.4	49	19.53	8	17	240.88	37	24.15	9	27	170.54	36	19.17
8	1	23	0	2	1	16	294.87	19	30.71	2	20	220.6	26	15.46	3	17	250.9	29	24.24	4	15	322.53	24	17.42	5	20	228.29	37	21.84	6	22	226.02	35	19.77	7	19	253.24	21	24.45	8	22	214.51	29	21.36	9	19	237.19	30	25.73
9	1	28	3	13	1	23	186.99	31	15	2	17	228.28	33	22.97	3	18	224.38	36	18.89	4	21	222.76	31	20.89	5	22	212.2	35	24.34	6	25	168.94	51	21.84	7	24	171.12	49	18.13	8	25	170.53	44	17.15	9	22	181.64	46	16.3
10	1	25	0	8	1	18	220.06	37	27.05	2	15	280.13	21	29.31	3	22	182.32	36	26.33	4	14	358.93	18	28.61	5	20	206.07	40	28.24	6	25	184.61	35	30.33	7	20	209.25	36	26.07	8	17	206.59	40	34.83	9	12	397.36	15	19.9
11	1	20	0	4	1	25	180.83	36	16.76	2	24	138.75	56	18.49	3	28	133.5	44	22.55	4	22	229.13	26	18.77	5	22	183.55	48	24.08	6	24	178.08	50	20.92	7	21	194.07	42	19.37	8	27	161.29	39	21.29	9	22	205.62	34	17.43
12	1	26	2	10	1	25	155.25	45	24.98	2	22	126.07	60	23.16	3	24	132.4	59	17.94	4	22	178.48	48	22.09	5	24	133.9	68	27.14	6	21	138.26	65	29.05	7	24	147.11	52	25.62	8	21	122.64	59	34.36	9	20	144.01	62	25.01
13	1	19	0	6	1	23	180.65	41	20.83	2	16	223.73	35	23.19	3	20	211.97	36	16.54	4	19	257.63	29	13.79	5	23	210.24	33	24.95	6	24	162.39	64	16.73	7	18	259.17	27	23.67	8	18	182.78	53	24.43	9	23	185	35	22.54
14	1	39	3	22	1	22	181.49	44	22.57	2	25	149.36	38	26.62	3	18	189.55	43	26.59	4	24	157.38	52	24.17	5	18	202.92	54	26.58	6	21	171.06	55	27.15	7	19	190.75	40	34.04	8	21	130.95	59	34.53	9	19	141.55	55	34.23
15	1	37	3	22	1	18	242.48	35	22.73	2	16	198.95	49	22.44	3	22	143.73	45	30.22	4	20	172.69	49	27.96	5	16	218.23	38	43.84	6	22	157.27	56	28.69	7	18	198.33	36	40.78	8	23	167.33	46	23.28	9	18	156.71	47	36.93
16	1	34	3	17	1	14	353.37	17	26.94	2	17	251.54	27	17.11	3	15	295.78	24	18.83	4	15	331.47	21	25.05	5	17	291.32	27	24.89	6	20	238.5	35	23.83	7	13	381.02	17	25.29	8	22	203.53	31	20.58	9	19	224.13	32	25.05
17	1	35	2	13	1	11	402.77	20	41.05	2	13	278.49	30	29.15	3	20	217.5	30	20.33	4	16	289.57	22	35.09	5	18	257.39	32	24.89	6	13	356.09	33	26.02	7	16	260.58	30	32.18	8	16	277.29	27	28.07	9	16	216.41	50	26.2
18	1	25	1	6	1	26	132.46	55	23.68	2	25	123.52	50	23.97	3	25	145.95	41	26.18	4	25	135.28	58	25.41	5	24	154.58	53	28.67	6	27	120.01	66	25.3	7	24	163.62	45	22.97	8	27	128.49	58	24.39	9	20	177.17	43	32.14
19	1	32	2	12	1	31	131.83	45	21.04	2	19	200.28	36	21.56	3	25	140.59	48	20.16	4	25	179.87	39	19.22	5	24	180.12	48	17.69	6	16	223.82	62	22.08	7	19	186.05	52	21.19	8	29	142.18	51	17.3	9	23	183.32	42	18.75
20	1	40	2	14	1	16	295.43	23	22.91	2	18	223.57	25	26.82	3	24	157.29	46	16.74	4	22	225.52	32	14.27	5	25	184.09	43	21.05	6	25	180.14	47	18.76	7	23	179.64	44	18.69	8	26	144.7	58	19.14	9	26	178.34	35	17.59
21	0	31	2	9	1	17	208.59	46	26	2	21	164.76	45	23.51	3	24	138.49	49	22.46	4	26	117.45	64	26.53	5	27	108.2	70	31.06	6	25	131.72	75	22.37	7	23	110.87	72	27.1	8	20	123.95	71	22.32	9	20	150.05	64	24.67
22	0	20	1	3	1	11	430.92	15	41.63	2	18	215.67	33	27.38	3	17	221.07	30	36.05	4	9	539.15	13	52.65	5	22	202.49	33	34.3	6	16	294.35	32	28.05	7	11	425.03	17	43.12	8	16	290.44	23	34.52	9	21	212.67	25	32.9
23	1	20	0	4	1	21	170.46	46	29.75	2	19	197.68	38	26.57	3	19	172.39	40	34.33	4	20	196.09	40	29.62	5	20	124.72	58	43.91	6	17	175.26	44	47.42	7	19	104.72	66	37.41	8	17	185.82	41	42.28	9	17	203.73	26	19.37
24	1	30	0	7	1	22	186.66	37	25.89	2	21	182.13	35	24.86	3	20	203.16	34	24.24	4	23	169.48	40	31.7	5	32	107.34	62	28.23	6	26	168.39	43	23.77	7	22	210.7	28	26.27	8	26	140.41	52	23.92	9	27	104.96	58	33.58
25	1	25	1	9	1	26	111.24	72	21.22	2	27	125.94	53	21.24	3	28	145.27	44	15.93	4	22	160.36	63	18.31	5	30	127.98	57	22.2	6	30	118.65	66	19.9	7	23	172.12	52	15.33	8	24	139.3	62	18.83	9	24	171.09	37	23.05
26	1	43	2	12	1	18	236.64	33	22.14	2	16	239.25	35	21.3	3	24	158.6	42	22.88	4	20	220.06	37	21.72	5	24	189.17	39	24.29	6	21	195.62	48	24.02	7	23	183.32	41	23.6	8	24	154.23	50	23.23	9	22	185.43	43	20.42
27	0	35	3	13	1	23	117.7	77	20.68	2	19	104.7	78	22.57	3	21	120.67	66	25.08	4	22	100.82	78	29.92	5	25	127.54	76	23.46	6	24	121.33	78	23.39	7	19	134.3	73	25.52	8	22	141.92	62	22.49	9	23	114.65	65	29.12
28	1	23	0	8	1	19	224.5	29	36.03	2	19	181.45	37	29.18	3	12	297.76	29	45.16	4	12	382.88	26	27.04	5	13	340.03	21	52.64	6	18	248.42	31	23.16	7	18	238.67	32	31.2	8	19	201.15	27	24.57	9	17	260.67	25	33.32
29	1	23	1	7	1	27	149.4	45	21.57	2	21	173.05	39	28.67	3	19	201.63	34	24.72	4	23	179.34	45	25.06	5	23	208.46	33	25.53	6	21	209.77	39	27.9	7	20	212.11	31	31.4	8	23	165.62	45	25.17	9	20	193.9	44	23.35
30	1	47	2	23	1	21	223.91	31	18.03	2	21	179.69	39	20.28	3	26	158.88	39	16.6	4	25	167.49	50	16.71	5	25	172.05	47	24.72	6	23	164.44	57	18.82	7	22	169.11	51	18.91	8	26	142.78	54	20.58	9	22	211.65	36	15.94
31	1	33	0	7	1	16	311.33	17	15.82	2	18	194.89	40	28.16	3	16	268.84	24	29.06	4	15	319.47	24	23.94	5	15	306.4	30	29.05	6	23	215.08	32	24.22	7	13	336.5	22	29.36	8	21	210.99	33	25.39	9	22	192.8	36	24.57
32	1	42	3	25	1	16	299.34	20	30.85	2	24	169.98	32	23.64	3	25	141.91	46	23.52	4	20	226.13	29	28.9	5	19	190.47	47	28.77	6	21	200.95	36	36.67	7	15	251.79	29	49.74	8	21	198.83	40	26.5	9	23	152.14	43	33.31
33	1	28	3	11	1	14	313.58	25	33.98	2	15	259.3	25	30.5	3	18	209.45	35	28.33	4	19	166.15	57	29.28	5	17	246.79	34	38.94	6	21	142.46	62	31.42	7	22	174.1	44	24.45	8	24	177.18	35	29.81	9	17	224.76	39	33.69
34	1	32	2	9	1	18	211.65	30	45.28	2	12	345.36	14	60.29	3	12	300.49	19	75.79	4	12	395.13	16	46	5	13	368.42	13	68.77	6	15	271.87	25	59.04	7	8	578.02	11	73.23	8	13	339.82	14	75.71	9	11	437.07	10	69.4
35	1	31	2	7	1	23	213.5	26	20.92	2	21	204.37	26	25.25	3	20	221.31	26	24.62	4	19	248.25	32	19.55	5	18	266.63	28	26.29	6	20	228.2	40	19.79	7	17	293.21	19	26	8	26	159.01	46	21.83	9	15	320.89	22	23.91
36	1	50	0	20	1	17	261.62	26	27.92	2	17	206.62	35	29.99	3	19	221.05	33	22.18	4	20	210.5	36	28.22	5	23	187.41	40	28.79	6	18	217.85	48	28.47	7	19	234.88	31	17.34	8	22	203.52	31	21.71	9	18	263.14	26	20.54
37	1	45	3	25	1	23	168.75	49	23.07	2	23	140.68	47	26.98	3	18	188.93	43	30.26	4	25	150.77	49	26.34	5	28	127.65	58	29.18	6	21	209.77	43	26.03	7	14	228.96	46	35.17	8	25	134.08	51	22.7	9	19	208.11	37	31.51
38	0	21	1	3	1	8	103	90	37.67	2	11	89.95	89	30.09	3	22	114.23	71	23.11	4	21	118.84	76	24.98	5	23	101.07	74	25.22	6	21	93.62	88	30.1	7	19	138.02	63	19.79	8	28	115.23	59	30.41	9	26	127.16	58	25.84
39	1	24	1	7	1	18	219.4	32	32.81	2	11	357.28	17	57.53	3	11	374.66	17	46.59	4	16	250.79	25	48.66	5	17	245.16	24	42.33	6	8	312.71	20	92.5	7	14	249.71	28	50.02	8	6	612.37	6	36	9	18	215.18	26	52.92
40	1	29	2	9	1	13	387.33	12	37.08	2	15	275.09	22	29.45	3	12	390.96	13	32	4	13	374.74	16	41.03	5	21	172.03	43	40.9	6	22	221.25	33	23.61	7	12	423.71	11	41.59	8	20	235.29	24	29.98	9	13	361.55	18	31.83
41	1	25	2	7	1	15	304.74	26	22.63	2	17	220.18	37	21.51	3	26	155.29	39	18.72	4	18	277.9	23	19.67	5	16	311.68	28	24.84	6	15	326	28	22.48	7	17	275.35	24	25.17	8	12	120.98	93	28.84	9	24	156.72	53	20.91
42	1	25	2	10	1	14	313.81	20	20.1	2	16	246.86	22	44.32	3	20	184.05	32	34.02	4	15	319.99	20	28.73	5	21	217.06	32	33.62	6	23	181.36	34	30.21	7	19	235.6	28	26.77	8	23	146.59	47	31.81	9	19	209.94	34	29.12
43	0	30	3	9	1	21	188.01	37	27.84	2	19	199.96	36	25.31	3	22	188.08	36	18.9	4	23	198.85	30	27.75	5	27	150.97	49	24.08	6	17	269.9	23	32.78	7	16	291.88	24	28.27	8	24	153.99	46	26.64	9	20	236.5	26	23.23
44	0	30	1	5	1	23	170.8	44	15.99	2	20	190.38	35	25.07	3	18	209.93	36	24.57	4	18	272.87	24	25.75	5	17	295.08	27	24.54	6	23	176.17	56	18.61	7	24	175.54	42	20.29	8	26	158.58	46	17.2	9	18	218.64	38	21.58
45	1	33	2	14	1	25	155.29	50	18.27	2	22	180.72	35	23.04	3	26	154.51	40	20.9	4	26	152.87	44	27.18	5	27	154.63	47	25.17	6	19	210.43	47	23.56	7	22	188.35	40	25.68	8	23	140.69	67	21.08	9	24	164.18	49	18.73
46	1	24	2	8	1	13	379.6	15	34.4	2	12	323.86	23	29.3	3	12	364.96	17	25.97	4	14	335.47	20	38.35	5	12	409.3	19	43.05	6	18	270.71	22	42.18	7	13	317.73	20	48.85	8	18	252.41	25	34.24	9	15	320.3	21	27.05
47	0	35	3	13	1	20	190.1	38	26.26	2	18	154.97	46	23.88	3	15	260.71	32	25.22	4	20	201.74	36	25.72	5	24	175.64	44	25.14	6	27	158.94	49	20.9	7	19	231.82	36	22.28	8	24	172.34	43	20.33	9	22	176.14	48	23.42
48	0	22	0	2	1	18	219.44	41	24.44	2	17	260.63	24	18.17	3	18	184.49	55	21.72	4	15	323.9	24	21.9	5	21	197.29	56	21.2	6	14	112.57	81	34.51	7	24	174.71	45	19.53	8	18	174.89	55	26.39	9	22	135.07	64	25.3
49	1	41	3	16	1	21	211.73	27	27.76	2	19	217.1	27	28.61	3	17	247.35	29	23.52	4	22	203.19	39	21.64	5	21	232.91	31	25.4	6	23	170.32	50	25.2	7	20	193.68	35	33.31	8	20	198.2	39	29.18	9	21	194.77	37	26
50	0	31	3	15	1	21	184.85	49	20.99	2	16	260.2	26	24.06	3	15	290.19	27	19.15	4	20	241.48	28	18.05	5	18	269.23	29	26.79	6	28	163.76	49	18.67	7	19	192.55	47	21.68	8	24	189.31	33	22.76	9	20	233.16	28	18.61
51	0	30	3	7	1	16	286.76	27	22.37	2	17	240.85	24	26.48	3	17	256.84	23	30.26	4	12	352.13	24	39.17	5	20	204.63	35	37.71	6	22	199.73	37	32.11	7	19	222.23	26	44.17	8	21	185.4	44	24.93	9	15	264.95	34	34.59
Codeing of Categorical Data:
SEX : 0 - woman, 1 - man
COMPETITION LEVEL : 0 - regional, 1 - Second League, 2 - First League, 3 - Super League
[truncated: 176 more columns]
